# Supplementary material for: Factor interaction analysis for chromosome 8 and DNA methylation alterations highlights innate immune response suppression and cytoskeletal changes in prostate cancer
Source: PubMed Central journal article supplement (PMC1797054; doi:10.1186/1476-4598-6-14), 2007-02-05

**KLRD1 (p = 0.27)**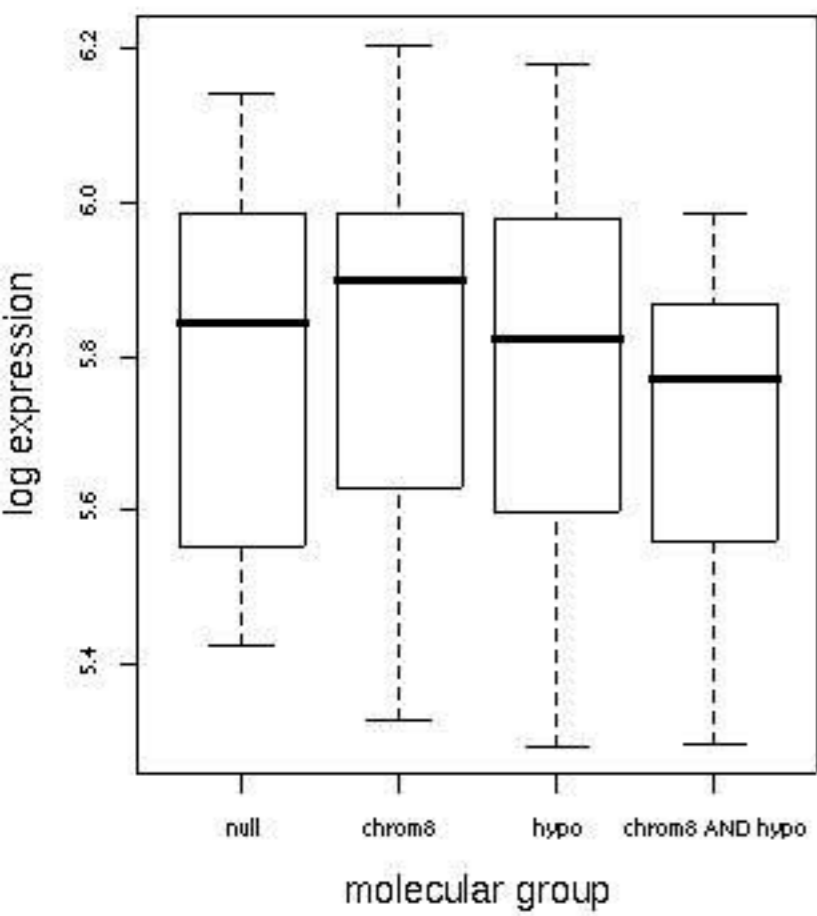**ITGA2 (p = 0.96)**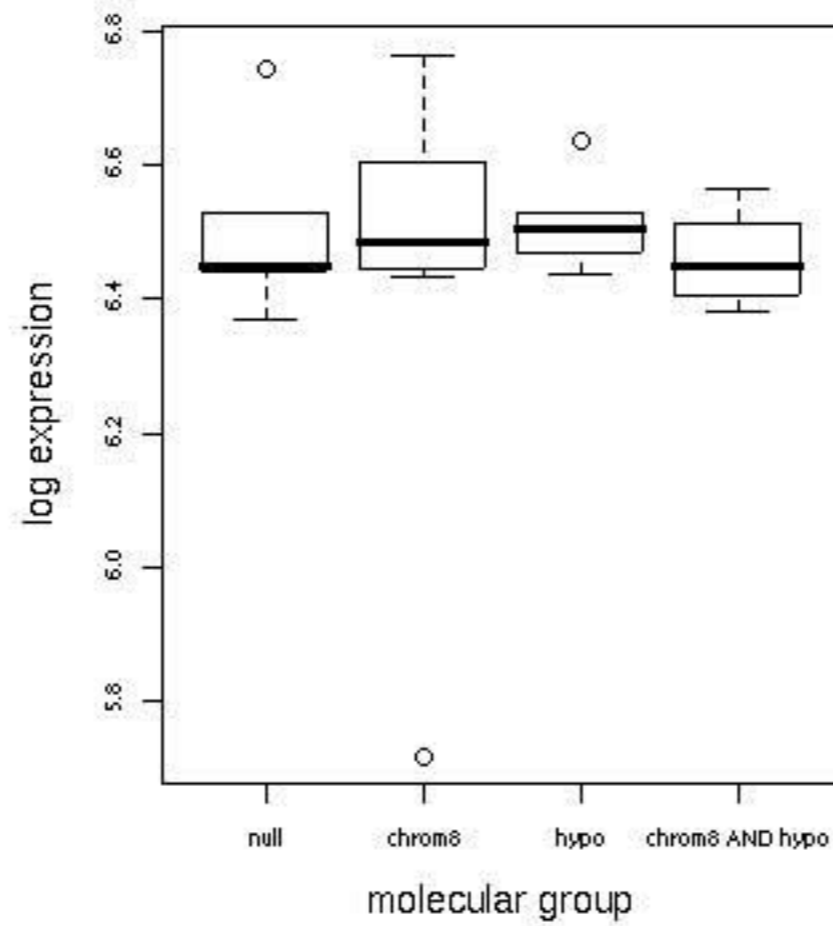**CPA3 (p = 0.12)**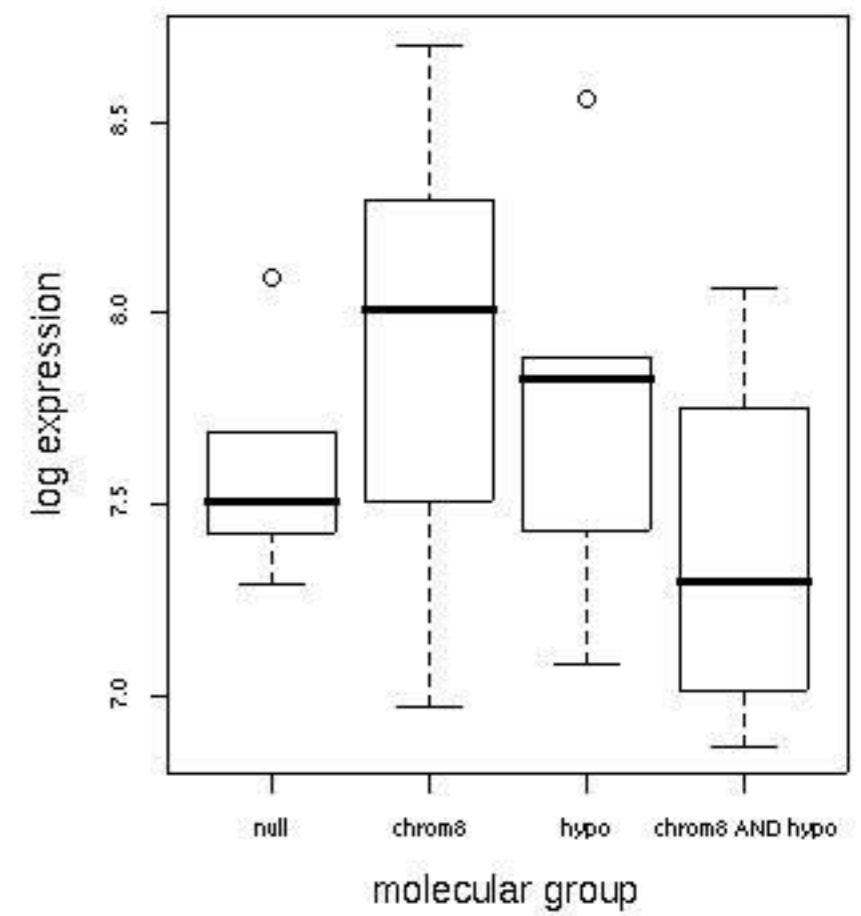**CD163 (p = 0.034)**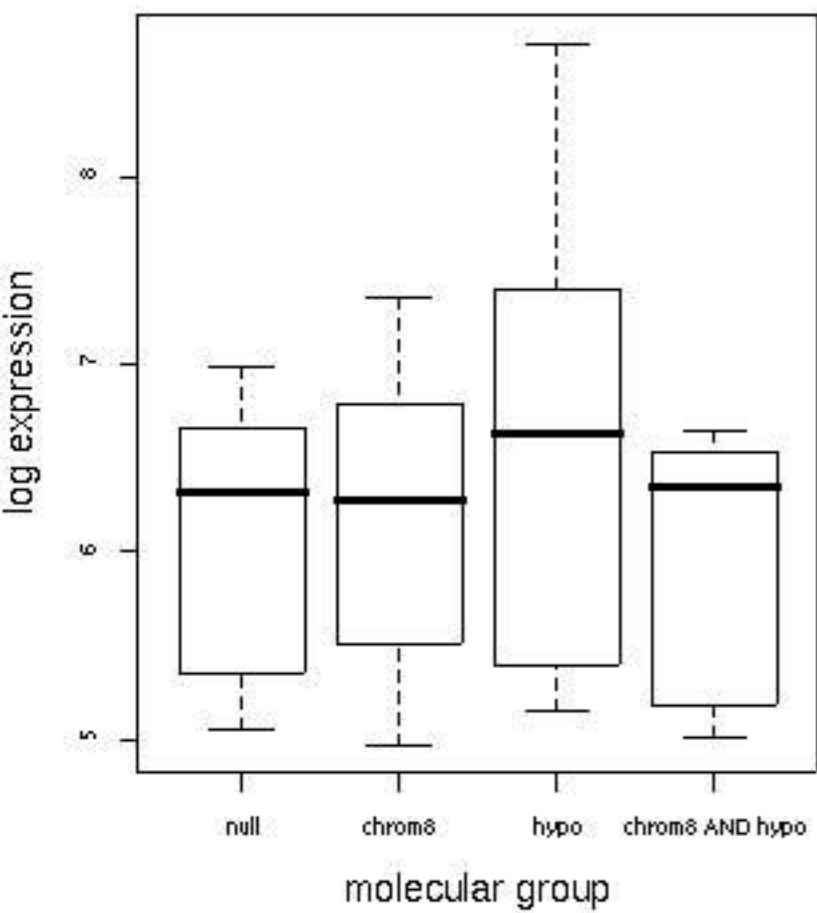**CD83 (p = 0.047)**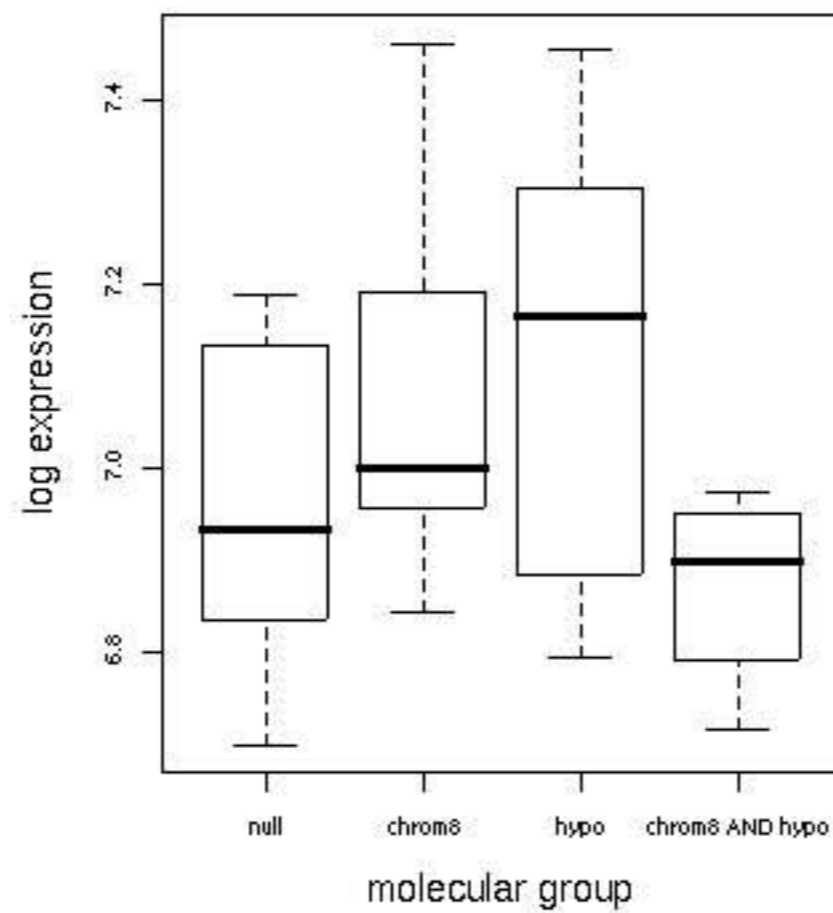**ADAM19 (p = 0.13)**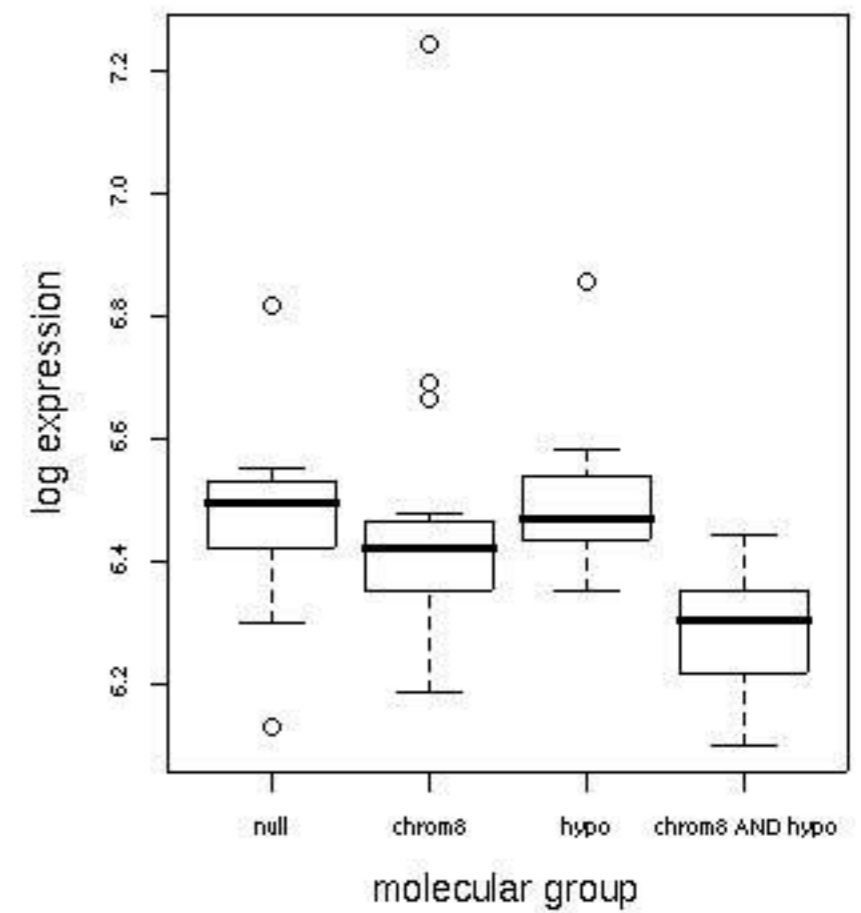**ITGAM (p = 0.0031)**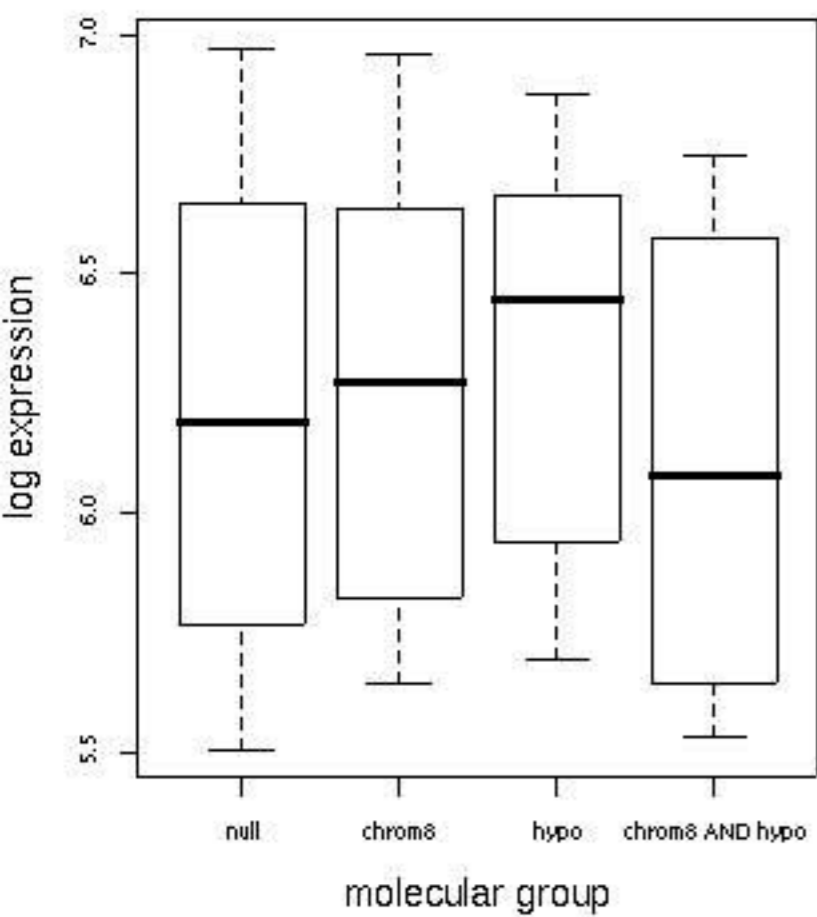

Supplement: 1476-4598-6-14-S2.pdf [file 1476-4598-6-14-S2.pdf]
